# Supplementary material
Source: publisher figshare collection journal article supplement (https://acs.figshare.com/ndownloader/files/4691449)
Supplement: Supplementary file 1 [file 4691449]

# Enhanced Photocatalytic Activity of ZnWO<sub>4</sub> Catalyst via Fluorine Doping

Guangli Huang, Yongfa Zhu\*

*Department of chemistry, Tsinghua University, Beijing 100084, P. R China*

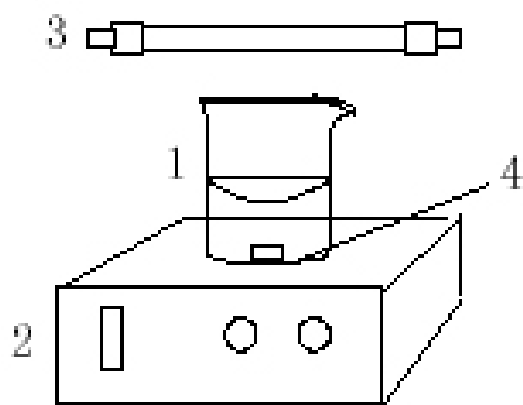

1.

Glass Beaker; 2. Magnetic Stirrer;

3. 11 W Low-Pressure Lamp  $\lambda = 254$  nm; 4. Magnetron.

**Figure S1.** The photocatalytic reaction system.

---

\* To whom correspondence should be addressed.

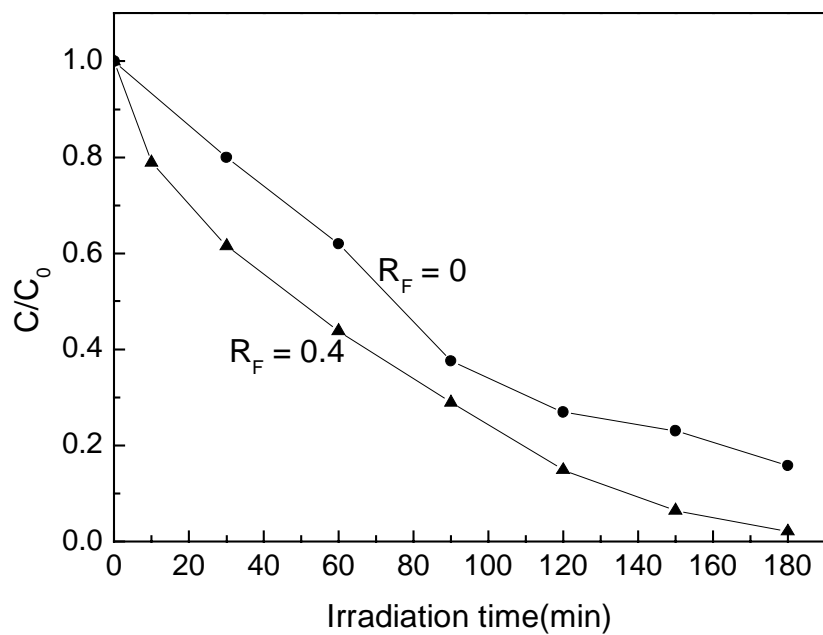

**Figure S2.** Photocatalytic degradation of 4-CP with initial concentration of 10mg/L using un-doped  $ZnWO_4$  ( $R_F = 0$ ) and fluorine doped  $ZnWO_4$  ( $R_F = 0.4$ ) catalysts; catalyst loading: 0.5 g/L; pH = 6.5,  $\lambda = 254$  nm.
